# Supplementary material for: In Vitro Efficacy of Gentamicin Alone and in Combination with Ceftriaxone, Ertapenem, and Azithromycin against Multidrug-Resistant Neisseria gonorrhoeae
Source: PubMed Central journal article supplement (PMC8528116; doi:10.1128/spectrum.00181-21), 2021-10-20
Supplement: spectrum00181-21_supp_1_seq2.pdf [file spectrum00181-21_supp_1_seq2.pdf]

## Supplemental Tables

**Supplemental Table 1. Phenotypic characteristics of 97 MDR *Neisseria gonorrhoeae* isolates selected for synergy test**

| Type   | Number | Category I antibiotics |     | Category II antibiotics |     |     |   |
|--------|--------|------------------------|-----|-------------------------|-----|-----|---|
|        |        | CRO                    | CFM | AZM                     | CIP | PEN |   |
| MDR-NG | A      | 1                      | DS  | DS                      | R   | R   | R |
|        | B      | 2                      | DS  | S                       | R   | R   | R |
|        | C      | 23                     | S   | DS                      | S   | R   | R |
|        | D      | 28                     | DS  | DS                      | S   | R   | R |
|        | E      | 42                     | DS  | S                       | S   | R   | R |
|        | F      | 1                      | S   | DS                      | R   | R   | R |

Abbreviations: MDR-NG, multidrug-resistant *Neisseria gonorrhoeae*; CRO, ceftriaxone; CFM, cefixime; SPT, spectinomycin; AZM, azithromycin; CIP, ciprofloxacin; PEN, penicillin; DS, decreased susceptibility; S, susceptible; R, resistant.

**Supplemental Table 2. Comparison of gentamicin MICs determined by agar dilution method and Etest for 97 MDR strains of *N. gonorrhoeae***

| Etest MIC (mg/L) | Agar dilution MIC (mg/L) |   |    |    |
|------------------|--------------------------|---|----|----|
|                  | 2                        | 4 | 8  | 16 |
| 2                | 2 <sup>a</sup>           | 1 |    |    |
| 3                | 1                        | 3 | 3  |    |
| 4                |                          | 2 | 16 | 1  |
| 6                |                          |   | 25 | 2  |
| 8                |                          |   | 23 | 14 |
| 10               |                          |   |    | 1  |
| 12               |                          |   |    | 3  |

<sup>a</sup>The number in each cell represents the number of isolates that display the indicated MICs.

**Supplemental Table 3. Comparisons with synergy testing from published studies using gentamicin in combination with ertapenem, ceftriaxone and azithromycin**

| Combination | Country | Year <sup>a</sup> | Isolates                                         | Method | S    | A   | FICI  | Interpretations | Reference  |
|-------------|---------|-------------------|--------------------------------------------------|--------|------|-----|-------|-----------------|------------|
|             |         |                   |                                                  |        | (%)  | (%) |       |                 |            |
| GEN+CRO     | India   | 2013-2017         | 95 isolates including 79 MDR and one XDR isolate | Etest  | 14.7 | 6.3 | 0.977 | Indifference    | (1)        |
|             | US      | 2007-2012         | 32 isolates displaying varying cefixime MICs     | Etest  | 0    | 0   | 1.25  | Indifference    | (2)        |
|             | Canada  | -                 | 9 WHO reference strains                          | Etest  | 0    | 0   | 1.2   | Indifference    | (3)        |
|             | China   | 2016-2017         | MDR                                              | Etest  | 16.5 | 0   | 0.747 | Indifference    | This study |

|         |       |           |                                                  |       |      |     |       |              |            |
|---------|-------|-----------|--------------------------------------------------|-------|------|-----|-------|--------------|------------|
| GEN+ETP | India | 2013-2017 | 95 isolates including 79 MDR and one XDR isolate | Etest | 31.6 | 0   | 0.603 | Indifference | (1)        |
|         | China | 2016-2017 | MDR                                              | Etest | 27.8 | 0   | 0.662 | Indifference | This study |
| GEN+AZM | India | 2013-2017 | 95 isolates including 79 MDR and one XDR isolate | Etest | 11.6 | 6.3 | 1.257 | Indifference | (1)        |
|         | India | 2013-2017 | 70 isolates displaying varying ceftriaxone MICs  | Etest | 22.9 | 0   | 0.952 | Indifference | (4)        |
|         | UK    | 2007-2010 | 64 isolates displaying varying cefixime MICs     | AD    | 0    | 0   | 1.7   | Indifference | (5)        |
|         | Japan | 2011      | 25 isolates displaying varying ceftriaxone MICs  | CB    | 0    | 0   | 0.83  | Indifference | (6)        |
|         | China | 2016-2017 | MDR                                              | Etest | 8.2  | 0   | 1.021 | Indifference | This study |

Abbreviations: GEN, gentamicin; CRO, ceftriaxone; ETP, ertapenem; AZM, azithromycin; S, synergy; A, antagonism; MDR, multidrug-resistant; XDR, extensively drug resistant; MIC, minimum inhibitory concentration; AD, agar dilution; CB, checkerboard; FICI, fractional inhibitory concentration.

<sup>a</sup>Year of strain collection.

## REFERENCES

1. Singh, V., M. Bala, A. Bhargava, M. Kakran, and R. Bhatnagar. 2018. In vitro efficacy of 21 dual antimicrobial combinations comprising novel and currently recommended combinations for treatment of drug resistant gonorrhoea in future era. *PLoS One* 13:e0193678.
2. Barbee, L. A., O. O. Soge, K. K. Holmes, and M. R. Golden. 2014. In vitro synergy testing of novel antimicrobial combination therapies against *Neisseria gonorrhoeae*. *J Antimicrob Chemother* 69:1572-1578.
3. Bharat, A., I. Martin, G. G. Zhanel, and M. R. Mulvey. 2016. In vitro potency and combination testing of antimicrobial agents against *Neisseria gonorrhoeae*. *J Infect Chemother* 22:194-7.
4. Sood, S., S. K. Agarwal, R. Singh, S. Gupta, and V. K. Sharma. 2019. In vitro assessment of gentamicin and azithromycin-based combination therapy against *Neisseria gonorrhoeae* isolates in India. *J Med Microbiol* 68:555-559.
5. Pereira, R., M. J. Cole, and C. A. Ison. 2013. Combination therapy for gonorrhoea: in vitro synergy testing. *J Antimicrob Chemother* 68:640-643.
6. Furuya, R., Y. Koga, S. Irie, M. Tanaka, F. Ikeda, A. Kanayama, and I. Kobayashi. 2013. In vitro activities of antimicrobial combinations against clinical isolates of *Neisseria gonorrhoeae*. *J Infect Chemother* 19:1218-1220.
